# Supplementary material for: Ni-core CuO-shell fibers produced by electrospinning and electroplating as efficient photocathode materials for solar water splitting
Source: Royal Society of Chemistry journal article supplement (doi:10.1039/c8nr01070f), 2018-01-01
Supplement: c8nr01070f1.pdf [file c8nr01070f1.pdf]

## Supplementary Information for

# **Ni-core CuO-shell Fibers Produced by Electrospinning and Electroplating as Efficient Photocathode Materials for Solar Water Splitting**

**Hong-Seok Jo<sup>a,†</sup>, Min-Woo Kim<sup>a,†</sup>, Bhavana Joshi<sup>a</sup>, Edmund Samuel<sup>a</sup>, Hyun Yoon<sup>b</sup>,  
Mark T. Swihart<sup>c</sup>, Sam S. Yoon<sup>a,\*</sup>**

<sup>a</sup>School of Mechanical Engineering, Korea University, Seoul 02841, Republic of Korea

<sup>b</sup>KIER-UNIST Advanced Center for Energy, Korea Institute of Energy Research (KIER), 50, UNIST-gil, Ulsan  
44919, Republic of Korea

<sup>c</sup>Department of Chemical & Biological Engineering, University at Buffalo, The State University of New York,  
Buffalo, New York 14260-4200, U.S.A.

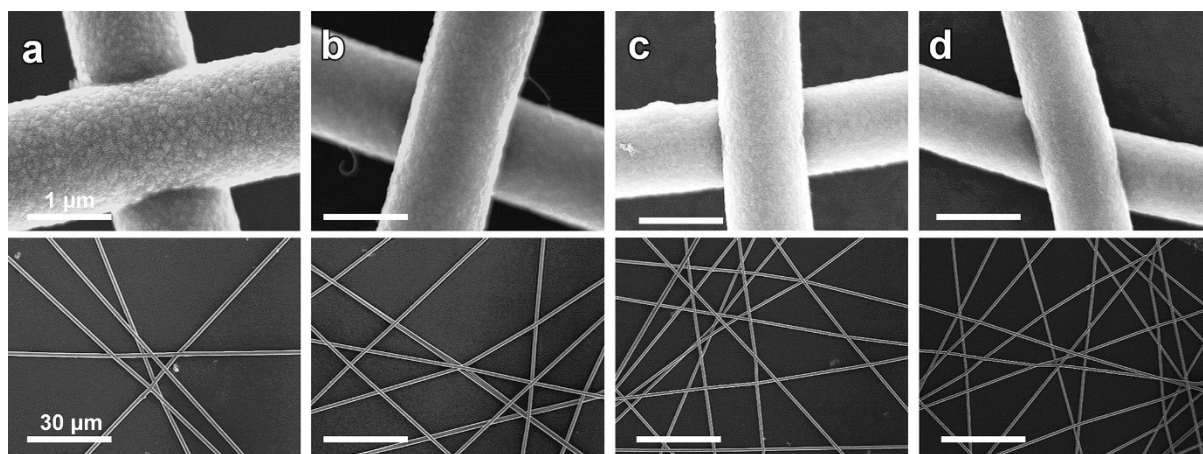

**Figure S1.** Top-view SEM images of the Ni fibers produced using electrospinning times of (a) 5, (b) 10, (c) 20, and (d) 30 s. The electroplating time was fixed at 10 s under 6 V applied voltage. Less Ni deposition per unit area is apparent for cases with longer electrospinning times.

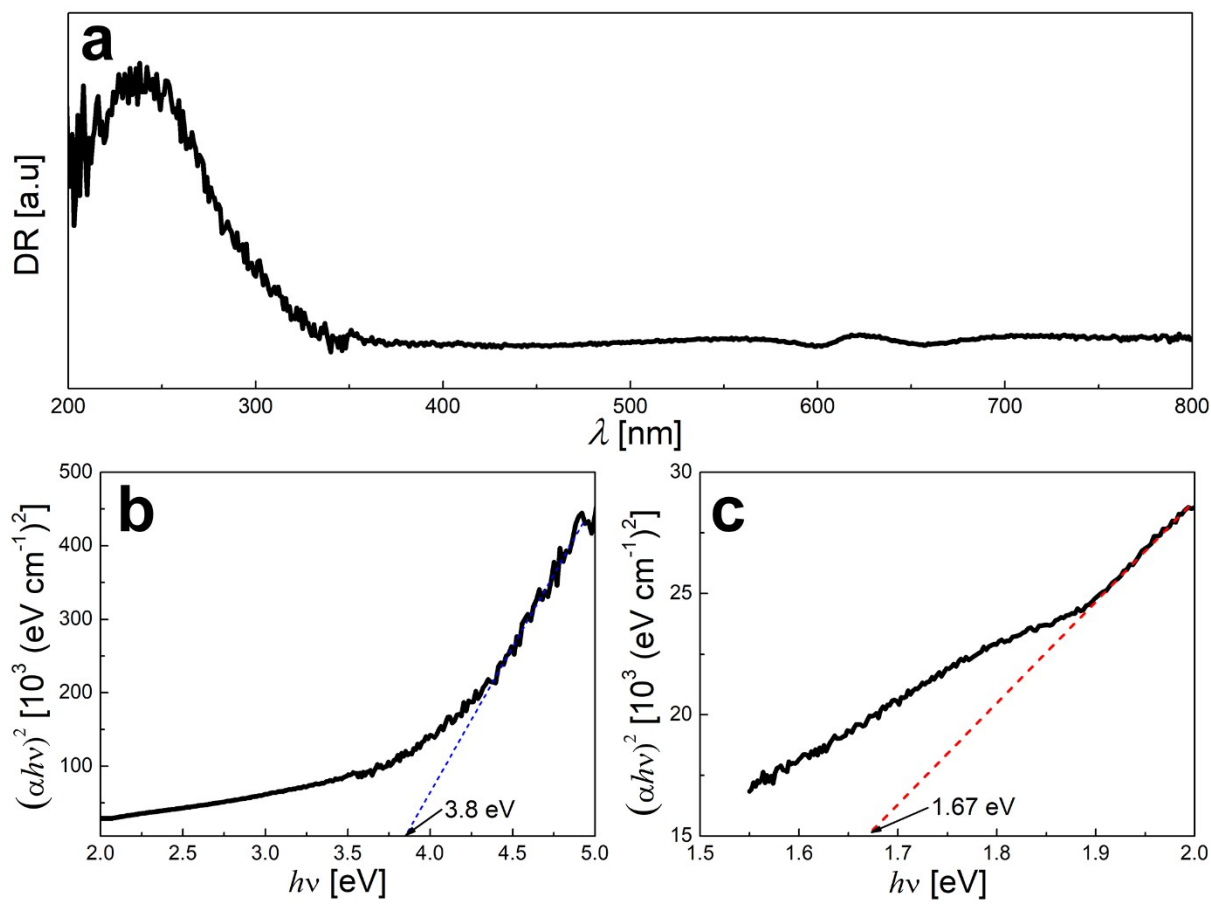

**Figure S2.** (a) The diffusediffuse reflectance (DR) versus wavelength from 200 to 800 nm. Tauc plots from DR-UV-VIS analysis at (b) region from 2.0 to 5.0 eV and (c) from 1.5 to 2.0 eV.

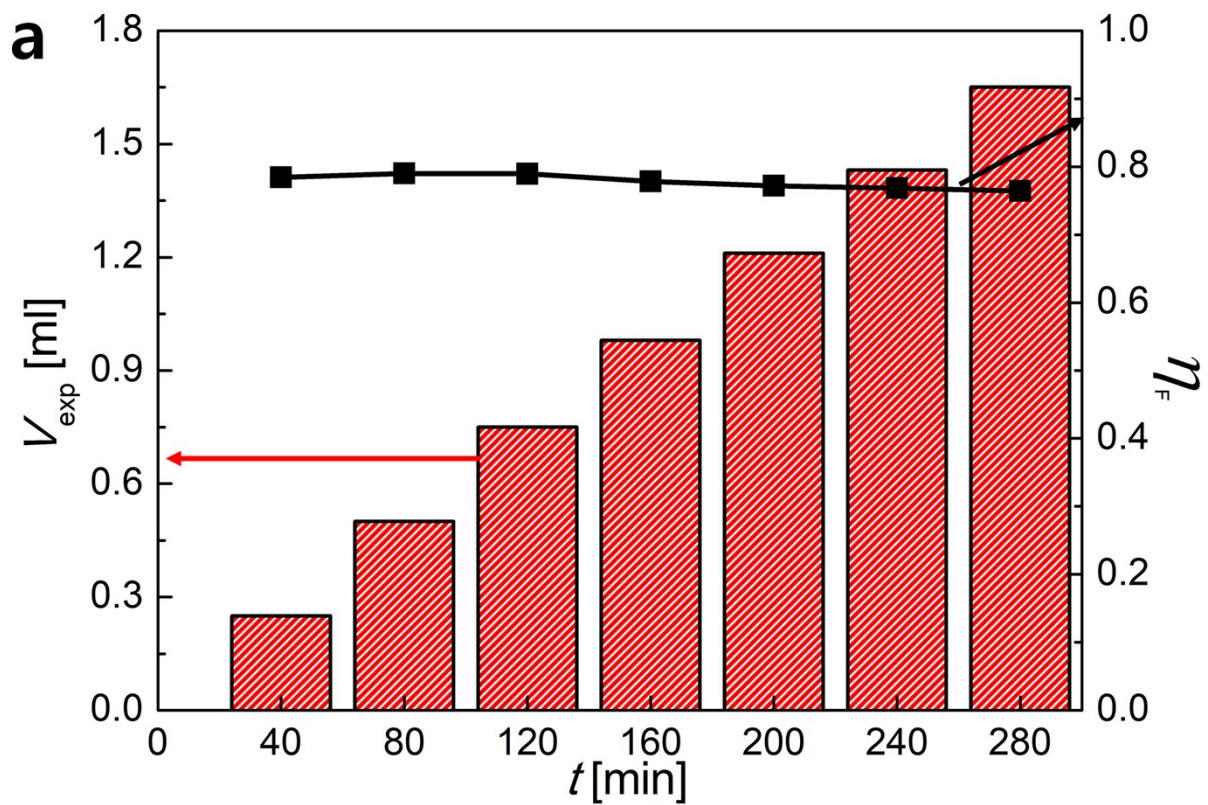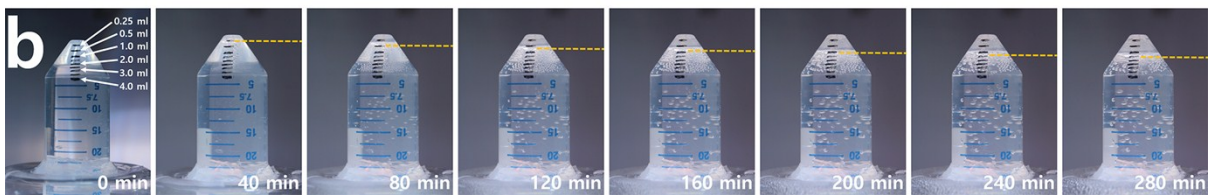

**Figure S2.** (a)  $V_{\text{exp}}$  and  $\eta_F$  versus  $t$  from 0 to 280 min and (b) the photos of  $V_{\text{exp}}$  corresponding  $t$  from 0 to 280 min.
